1 **Title Page**

2 **Plasticenta: Microplastics in Human Placenta**

3 Antonio Ragusa<sup>1</sup>, Alessandro Svelato<sup>1\*</sup>, Criselda Santacroce<sup>2</sup>, Piera Catalano<sup>2</sup>,

4 Valentina Notarstefano<sup>3</sup>, Oliana Carnevali<sup>3</sup>, Fabrizio Papa<sup>2</sup>, Mauro Ciro Antonio Rongioletti<sup>2</sup>, Federico

5 Baiocco<sup>1</sup>, Simonetta Draghi<sup>1</sup>, Elisabetta D'Amore<sup>1</sup>, Denise Rinaldo<sup>4</sup>, Maria Matta<sup>5</sup>, Elisabetta Giorgini<sup>3</sup>

6  
7 *1 - Department of Obstetrics and Gynecology, San Giovanni Calibita Fatebenefratelli Hospital, Isola Tiberina, Via di Ponte Quattro*

8 *Capi, 39, 00186, Roma (Italy)*

9 *2 - Department of Pathological Anatomy, San Giovanni Calibita Fatebenefratelli Hospital, Isola Tiberina, Via di Ponte Quattro*

10 *Capi, 39, 00186, Roma (Italy)*

11 *3 - Department of Life and Environmental Sciences, Università Politecnica delle Marche, via Brecce Bianche, 60131, Ancona (Italy)*

12 *4 - Department of Obstetrics and Gynecology, ASST Bergamo Est, Bolognini Hospital, Seriate, Via Paderno, 21, 24068, Bergamo*

13 *(Italy)*

14 *5 - Harvey Medical and Surgery Course, University of Pavia, Corso Strada Nuova 65, 27100, Pavia (Italy)*

15  
16  
17  
18 **\*Corresponding Author:**

19 Alessandro Svelato

20 Department of Obstetrics and Gynecology

21 San Giovanni Calibita Fatebenefratelli Hospital, Isola Tiberina, Rome, Italy

22 Via di Ponte Quattro capi, 39

23 00186, Rome, Italy

24 Telephone: +39 349 1272580

25 e-mail: [alessandrosvelato@virgilio.it](mailto:alessandrosvelato@virgilio.it)

26

27

28

## Summary paragraph

29

30 **Microplastics are particles smaller than five millimetres obtained from the degradation of**  
31 **plastic objects abandoned in the environment. Microplastics can move from the**  
32 **environment to living organisms and, in fact, they have been found in fishes and**  
33 **mammals.**

34 **Six human placentas, prospectively collected from consenting women with uneventful**  
35 **pregnancies, were analyzed by Raman Microspectroscopy to evaluate the presence of**  
36 **microparticles. Detected microparticles were characterized in terms of morphology and**  
37 **chemical composition.**

38 **12 microparticles, ranging from 5 to 10  $\mu\text{m}$  in size, were found in 4 out of 6 placentas: 5**  
39 **in the foetal side, 4 in the maternal side and 3 in the chorioamniotic membranes. All the**  
40 **analyzed microparticles were pigmented: three of them were identified as stained**  
41 **polypropylene, while for the other nine it was possible to identify only the pigments, which are**  
42 **all used for man-made coatings, paints and dyes.**

43 **Here we show, for the first time, the presence of microparticles and microplastics in human**  
44 **placenta. This sheds new light on the impact of plastic on human health. Microparticles and**  
45 **microplastics in the placenta, together with the endocrine disruptors transported by them,**  
46 **could have long-term effects on human health.**

47

48

49

50

51

52

53

54 **INTRODUCTION**

55 *“...avoiding the use of plastic and paper, reducing*  
56 *water consumption, separating refuse...”*

57 **HOLY FATHER FRANCIS**

58 **From: ENCYCLICAL LETTER LAUDATO SI' ON**  
59 **CARE FOR OUR COMMON HOME**

60

61 In the last century, the global production of plastics has grown exponentially by over 350  
62 millions of tons per year, and a part ends up polluting the environment<sup>1</sup>. It has been estimated  
63 that 8.3 billion tons of plastic have been produced since the 1950s, with a constant increase in  
64 the last three decades. Global production of plastics currently exceeds 320 million tons (Mt)  
65 per year, and over 40% is used as single-use packaging, hence producing plastic waste. In  
66 Europe, 26 million tons of plastic waste are produced every year; only 30% is collected for  
67 recycling, while the rest is burned or ends up in landfills and it is dispersed into the  
68 environment. The degradation that plastics undergo when released into the environment is a  
69 serious issue. Exposure to ultraviolet radiation and photo-oxidation in combination with wind,  
70 wave action and abrasion, degrade plastic fragments into micro and nanosized particles. These  
71 particles pass with relative ease through wastewater filters, making their recovery impossible  
72 when they reach the sea. Here, corrosion, high temperatures, waves, wind, ultraviolet radiation,  
73 and microbial action, continue the slow process of degradation. The small debris remains at the  
74 mercy of the currents, floating, going to the bottom, or ending up on the beaches. In fact, most  
75 of the seabed all over the world and in the Mediterranean sea in particular, is made of plastic,  
76 resulting from the waste recovered on the coasts and in the sea. Microplastics (MPs) are  
77 defined as particles less than 5 mm in size<sup>2</sup>. MPs do not derive only from larger pieces  
78 fragmentation, but are also produced in these dimensions for commercial uses. They can be

79 found in aqueous, terrestrial and aerial environments<sup>3</sup>. Furthermore, there are several reports of  
80 microplastics in food<sup>4</sup>, and in particular in seafood, sea salt<sup>5,6</sup>, and in drinking water<sup>7</sup>.  
81 Microplastics have also been detected in the gastrointestinal tract of marine animals<sup>8,9</sup>.

82 Inside tissues, MPs and microparticles are considered as foreign bodies by the host organism  
83 and, as such, trigger local immunoreactions. Furthermore, they can act as carriers for other  
84 chemicals, such as environmental pollutants or plastic additives, which are known for their  
85 harmful effects<sup>10,11</sup>.

86 Although there are recent reports highlighting public health concerns due to microplastics  
87 presence in food, to date there is little data available. A study reports detection of microplastics  
88 in the human intestine<sup>12</sup>. There are also reports on microplastics inhalation in humans: this  
89 seems to be an important route of diffusion. However, to date microplastics have never been  
90 reported within human placentas.

91 In this study, we investigated, for the first time, the presence of microparticles and  
92 microplastics in human placentas. Placenta finely regulates foetal to maternal environment  
93 and, indirectly, to the external one, acting as a crucial interface via different complex  
94 mechanisms<sup>13</sup>. The potential presence of man-made microparticles in this organ may harm the  
95 delicate response of differentiation between self and non-self<sup>14</sup>, with a series of related  
96 consequences that need to be defined.

97 In this light, we performed a Raman Microspectroscopy analysis on digested samples of  
98 placenta collected from six consenting patients with uneventful pregnancies, to investigate the  
99 presence of microplastics and microparticles.

100

## 101 **METHODS**

### 102 Experimental design

103 This was a pilot observational descriptive preclinical study, with prospective and unicentric open  
104 cohort. It was approved by the Ethical Committee Lazio 1 (Protocol N. 352/CE Lazio 1; March 31<sup>th</sup>,

105 2020), and it was carried out in full accordance with ethical principles, including The Code of  
106 Ethics of the World Medical Association (Declaration of Helsinki) for experiments involving  
107 humans<sup>15</sup>. To participate to this study, six selected consenting patients signed an informed consent,  
108 which included donation of placentas. The experimental design of the study is sketched in Figure 1.

### 109 **Enrolment of patients and placentas collection**

110 All recruited women were healthy, at term of pregnancy. Exclusion criteria were:

- 111 • peculiar diets prescribed for any particular medical condition, 4 weeks before delivery;
- 112 • diarrhoea or constipation, two weeks before delivery;
- 113 • antibiotics intake, two weeks before delivery;
- 114 • assumption of drugs affecting intestinal reabsorption (such as activated charcoal, or  
115 cholestyramine), two weeks before delivery;
- 116 • diagnosis of gastrointestinal disease (such as ulcerative colitis, or Crohn's disease), cancer,  
117 organ transplantation, HIV, or other severe pathologies that needed medical treatment;
- 118 • invasive or abrasive dental treatment, two weeks before delivery;
- 119 • participation to a clinical study, four weeks before delivery
- 120 • alcohol abuse (defined as a >10 score in the Alcohol Use Disorders Identification Test).

121 In order to get information on the chemicals taken by patients the week before delivery, women  
122 were asked to fill a questionnaire to record their food consumption (omnivorous, vegetarian, vegan,  
123 with no diet restriction), with particular attention to seafood, food sealed in plastic containers/films,  
124 beverages in plastic bottles, carbonated drinks, alcoholic drinks, chewing gums containing  
125 microplastics. Moreover, patients were asked to take note of the use of toothpastes and cosmetics  
126 containing microplastics or synthetic polymers, and cigarette smoking.

127 All six women had a vaginal delivery, at the Department of Obstetrics and Gynaecology of San  
128 Giovanni Calibita Fatebenefratelli Hospital, Isola Tiberina, Roma (Italy). All placentas were  
129 collected according to a protocol specially designed to be plastic-free, with a special focus on  
130 avoiding contaminations from plastic fibres or particles. Obstetricians and midwives used cotton

131 gloves to assist women in labour. In the delivery room, only cotton towels were used to cover  
132 patients' beds; graduate bags to estimate postpartum blood loss were not used during delivery, but  
133 they were brought in the delivery room only after birth, when umbilical cord was already clamped  
134 and cut with metal clippers, avoiding contact with plastic material. After birth, placentas were  
135 deposited onto a metal container and immediately taken to the Laboratory of Pathological Anatomy,  
136 San Giovanni Calibita Fatebenefratelli Hospital, Isola Tiberina, Roma (Italy). Pathologist,  
137 wearing cotton gloves and using metal scalpels, collected from each placenta, portions (mean  
138 weight:  $23.3 \pm 5.7$  g) taken from maternal side, foetal side, and chorioamniotic membranes. All  
139 samples, strictly anonymous, were labelled with number codes and stored in glass bottles with metal  
140 lids at  $-20^{\circ}\text{C}$  with no further treatment. By expedited refrigerated transport, samples were shipped  
141 to the Laboratory of Vibrational Spectroscopy, Department of Life and Environmental Sciences,  
142 Università Politecnica delle Marche (Ancona, Italy).

#### 143 **Extraction of microparticles from placenta samples**

144 The extraction of microparticles from the portions of placenta, collected at San Giovanni Calibita  
145 Fatebenefratelli Hospital (Rome, Italy) and their analysis by Raman Microspectroscopy were  
146 performed at the Laboratory of Vibrational Spectroscopy, Department of Life and Environmental  
147 Sciences, Università Politecnica delle Marche (Ancona, Italy). To prevent plastic contamination,  
148 cotton laboratory coats, face masks and single-use latex gloves were worn during sample handling,  
149 preparation of samples and during the entire experiment. Work surfaces were thoroughly washed  
150 with 70% ethanol prior starting all procedures. All liquids (deionised water for cleaning and for  
151 preparation of KOH solution) were filtered through  $1.6\ \mu\text{m}$ -pore-size filter membrane (Whatman  
152 GF/A). Glassware and instruments, including scissors, tweezers and scalpels, were washed using  
153 dishwashing liquid, rinsed with deionised water and finally rinsed with  $1.6\ \mu\text{m}$ -filtered deionised  
154 water. Since the experiments were conducted without the use of the laminar flow hood, the plastic  
155 fibres found in the samples were not considered in the results.

156 Microparticles' isolation from placenta samples was performed modifying the protocols from two  
157 previous works<sup>16,17</sup>. Samples were weighed and placed in a glass container cleaned as previously  
158 explained. A 10% KOH solution was prepared using 1.6 µm-filtered deionised water and KOH  
159 tablets (Sigma-Aldrich). This solution was added to each jar in a ratio with the sample of 1:8 (w/v).  
160 The containers were then sealed and incubated at room temperature for 7 days.  
161 Digestates were then filtered through 1.6 µm-pore-size filter membrane (Whatman GF/A) using a  
162 vacuum pump connected to a filter funnel. The filter papers were dried at room temperature and  
163 stored in glass Petri dishes until visual identification and spectroscopic characterization of particles.  
164 Three procedural blanks, obtained following the same procedure above described, but without  
165 placenta samples and maintained close to the samples during their manipulation, were tested to  
166 monitor and correct potential contaminations<sup>16</sup>.

#### 167 **Analysis of microparticles by Raman Microspectroscopy**

168 The analysis of microparticles found in the placenta samples was performed by a Raman XploRA  
169 Nano Microspectrometer (Horiba Scientific). The following protocol was adopted: (1) to highlight  
170 the presence of microparticles (<20 µm), filter membranes were inspected by visible light using a  
171 ×10 objective (Olympus MPLAN10x/0.25); (2) the detected microparticles were first  
172 morphologically characterized by a ×100 objective (Olympus MPLAN100x/0.90), and (3) then  
173 directly analyzed on the filter by Raman Microspectroscopy (spectral range 160-2000 cm<sup>-1</sup>, 785 nm  
174 laser diode, 600 lines per mm grating). The spectra were dispersed onto a 16-bit dynamic range  
175 Peltier cooled CCD detector; the spectrometer was calibrated to the 520.7 cm<sup>-1</sup> line of silicon prior  
176 to spectral acquisition.

177 Raw Raman spectra were submitted to polynomial baseline correction and vector normalization, in  
178 order to reduce noise and enhance spectrum quality (Labspec 6 software, Horiba Scientific). The  
179 collected Raman spectra were compared with those reported in the SLOPP Library of Microplastics  
180 (Spectral Library of Plastic Particles<sup>18</sup>) and in the spectral library of the KnowItAll software (Bio-

181 Rad Laboratories, Inc.). Similarities of more than 80 of Hit Quality Index (HQI) were considered  
182 satisfactory.

183 All data generated or analysed during this study are included in this published article.

184

## 185 **RESULTS**

186 From each placenta, three portions (one from maternal side, one from foetal side and one from  
187 chorioamniotic membranes, for a total of eighteen pieces) were collected and processed for the  
188 subsequent analysis by Raman Microspectroscopy, to verify the presence of microplastics and,  
189 more in general, of microparticles similar to man-made products. As described in the Methods  
190 section, strict precautions were taken to prevent contaminations; no microparticles were detected on  
191 the filters of the blank procedural samples. In total, 12 microparticles, characterized as microplastics  
192 and other man-made materials, were detected in the placentas of 4 out of the 6 enrolled patients.  
193 In particular, 5 microparticles were found in the foetal side portions, 4 in the maternal side portions,  
194 and 3 in the chorioamniotic membranes. All the analyzed microparticles were pigmented; pigments  
195 are usually added to polymers in order to colour plastic products, and are added also to coloured  
196 paints and coatings, which are ubiquitous as microplastics<sup>19</sup>.

197 A retrospective analysis based on Raman spectral information and data reported in literature was  
198 performed to define the nature of these microparticles. Firstly, the collected Raman spectra were  
199 compared with those stored in the spectral library of the KnowItAll software (Bio-Rad Laboratories,  
200 Inc.). Due to the presence of pigments, in many cases, collected Raman spectra resulted mainly due  
201 to the signals of the pigment itself<sup>19,20</sup>. It is known that Raman scattering is more sensitive to the  
202 chemical functional groups of pigments, which cover with their signals the entire Raman spectrum,  
203 than to the polymeric matrix<sup>21</sup>. In these cases, the KnowItAll software allows to identify the  
204 pigments contained in the microparticles. By matching the results from the KnowItAll software  
205 with the information obtained by consulting the European Chemical Agency (ECHA<sup>22</sup>), it was  
206 possible to accurately identify the commercial name, chemical formula, IUPAC name and Color



207 Index Constitution Number of all pigments. Then, in order to uncover the identity of the polymer  
 208 matrix of the detected microparticles, the collected Raman spectra were also compared with those  
 209 reported in the SLOPP library of microplastics (Spectral Library of Plastic Particles<sup>18</sup>). Only for  
 210 three microparticles, it was possible to unveil the signals of the polymer matrix in the spectrum.  
 211 Table 1 reports the morphological and chemical features of the detected microparticles and relative  
 212 pigments, together with information regarding the placenta portion in which they were found.

| Table 1. Morphological and chemical features of the detected microparticles and relative pigments, together with information regarding the placenta portion in which they were found (fetal side FS; maternal side MS, and chorio amnio membrane CAM; Hit Quality Index HQI). |                  |                |           |                |                                                                          |                                                                                                                                                                                                                                                                            |       |
|-------------------------------------------------------------------------------------------------------------------------------------------------------------------------------------------------------------------------------------------------------------------------------|------------------|----------------|-----------|----------------|--------------------------------------------------------------------------|----------------------------------------------------------------------------------------------------------------------------------------------------------------------------------------------------------------------------------------------------------------------------|-------|
| Particle                                                                                                                                                                                                                                                                      | Placenta Portion | Microparticles |           |                |                                                                          |                                                                                                                                                                                                                                                                            |       |
|                                                                                                                                                                                                                                                                               |                  | Morphology     |           | Polymer matrix | Pigment                                                                  |                                                                                                                                                                                                                                                                            |       |
|                                                                                                                                                                                                                                                                               |                  | Size           | Color     |                | Generic name                                                             | Molecular formula and IUPAC name                                                                                                                                                                                                                                           | HQI   |
| #1                                                                                                                                                                                                                                                                            | FS               | ~10 μm         | Orange    |                | Iron hydroxide oxide yellow (Pigment Yellow 43; C.I. Constitution 77492) | FeO(OH) iron(III) oxide hydroxide                                                                                                                                                                                                                                          | 89.97 |
| #2                                                                                                                                                                                                                                                                            | CAM              | ~10 μm         | Blue      | Polypropylene  | Copper phthalocyanine (Pigment Blue 15; C.I. Constitution 74160)         | C <sub>32</sub> H <sub>16</sub> CuN <sub>8</sub> (29H,31H-phthalocyaninato(2-)-N29,N30,N31,N32)copper(II)                                                                                                                                                                  | 82.86 |
| #5                                                                                                                                                                                                                                                                            | MS               | ~5 μm          | Blue      |                |                                                                          |                                                                                                                                                                                                                                                                            | 86.15 |
| #10                                                                                                                                                                                                                                                                           | FS               | ~10 μm         | Blue      |                |                                                                          |                                                                                                                                                                                                                                                                            | 80.60 |
| #3                                                                                                                                                                                                                                                                            | FS               | ~10 μm         | Blue      |                | Phthalocyanine Blue BN (Pigment Blue 16; C.I. Constitution 74100)        | C <sub>32</sub> H <sub>18</sub> N <sub>8</sub> 29H,31H-phthalocyanine                                                                                                                                                                                                      | 89.16 |
| #4                                                                                                                                                                                                                                                                            | MS               | ~10 μm         | Dark blue |                | Violanthrone (Pigment Blue 65; C.I. Constitution 59800)                  | C <sub>34</sub> H <sub>16</sub> O <sub>2</sub> Anthra[9,1,2-cde]benzo[rs]pentaphene-5,10-dione                                                                                                                                                                             | 86.44 |
| #6                                                                                                                                                                                                                                                                            | MS               | ~10 μm         | Red       |                | Diiron trioxide (Pigment Red 101/102; C.I. Constitution 77491)           | Fe <sub>2</sub> O <sub>3</sub> Oxo(oxoferriooxy)iron                                                                                                                                                                                                                       | 83.65 |
| #7                                                                                                                                                                                                                                                                            |                  |                |           |                |                                                                          |                                                                                                                                                                                                                                                                            | 89.80 |
| #8                                                                                                                                                                                                                                                                            | CAM              | ~5 μm          | Dark blue |                | Pigment Direct Blue 80                                                   | C <sub>32</sub> H <sub>14</sub> Cu <sub>2</sub> N <sub>4</sub> Na <sub>4</sub> O <sub>16</sub> S <sub>4</sub> Dicopper,tetrasodium,3-oxido-4-[[2-oxido-4-[3-oxido-4-[(2-oxido-3,6-disulfonat)naphthalen-1-yl]diazenyl] phenyl]phenyl] diazenyl]naphthalene-2,7-disulfonate | 84.55 |
| #9                                                                                                                                                                                                                                                                            | CAM              | ~10 μm         | Dark blue |                | Ultramarine Blue (Pigment Blue 29; C.I. Constitution 77007)              | Al <sub>6</sub> Na <sub>8</sub> O <sub>24</sub> S <sub>3</sub> Si <sub>6</sub> Aluminium Sodium orthosilicate trisulfane-1,3-diide                                                                                                                                         | 91.96 |
| #11                                                                                                                                                                                                                                                                           | FS               | ~10 μm         | Violet    | Polypropylene  | Hostopen violet (Pigment Violet 23; C.I. Constitution 51319)             | C <sub>34</sub> H <sub>22</sub> Cl <sub>2</sub> N <sub>4</sub> O <sub>2</sub> 8,18-Dichloro-5,15-diethyl-5,15-dihydrodiindolo(3,2-b:3'2'-m)triphenodioxazine                                                                                                               | 80.92 |
| #12                                                                                                                                                                                                                                                                           | FS               | ~10 μm         | Pink      |                | Novoperm Bordeaux HF3R (Pigment Violet 32; C.I. Constitution 12517)      | C <sub>27</sub> H <sub>24</sub> N <sub>6</sub> O <sub>7</sub> S 4-[(E)-2-[2,5-dimethoxy-4-(methylsulfamoyl)phenyl]diazen-1-yl]-3-hydroxy-N-(2-oxo-2,3-dihydro-1H-1,3-benzodiazol-5-yl)naphthalene-2-carboxamide                                                            | 84.57 |

213 The microphotographs of the analyzed microparticles are reported in Figure 2, together with the  
214 collected Raman spectra.

215 The interpretation of the spectral data is discussed below.

216 **Particle #1** (Figure 2a). The collected Raman spectrum resulted perfectly superimposable to the one  
217 of the pigment Iron hydroxide oxide yellow: the two spectra shared the main peak at  $396\text{ cm}^{-1}$ ,  
218 related to the vibrations of iron oxides/hydroxides. This pigment is described as powder or  
219 particulate, and it is used for coloration of polymers (plastics and rubber) and in a wide variety of  
220 cosmetics, such as BB creams and foundations.

221 **Particles #2 and #10** (Figure 2b). The collected Raman spectra resulted comparable to the one of a  
222 polypropylene (PP) blue sample. The Raman spectra of the identified particles shared with the  
223 reference spectrum the position of the main peaks, such as the peaks centred at  $253\text{ cm}^{-1}$  (wagging  
224 of  $\text{CH}_2$  moieties, bending of CH moieties),  $397\text{ cm}^{-1}$  (wagging of  $\text{CH}_2$  moieties, bending of CH  
225 moieties),  $839\text{ cm}^{-1}$  (rocking of  $\text{CH}_2$  and  $\text{CH}_3$  moieties, stretching of CC and C- $\text{CH}_3$  moieties),  $970$   
226  $\text{cm}^{-1}$  (rocking of  $\text{CH}_3$  moieties), and  $1455\text{ cm}^{-1}$  (bending of  $\text{CH}_3$  and  $\text{CH}_2$  moieties), all assigned to  
227  $\text{PP}^{23}$ . The bands at  $679\text{ cm}^{-1}$ ,  $1143\text{ cm}^{-1}$ ,  $1340\text{ cm}^{-1}$  and  $1527\text{ cm}^{-1}$ , common to reference blue  
228 polypropylene and sample spectra, are known to be related to Raman signals of blue pigments,  
229 mainly based on copper phthalocyanine<sup>24,25</sup>.

230 **Particle #3** (Figure 2c). The collected Raman spectrum resulted superimposable to the one of the  
231 blue pigment phthalocyanine<sup>25</sup>. This chemical is reported to be used in adhesives, coating products,  
232 plasters, finger paints, polymers and cosmetics and personal care products.

233 **Particle #4** (Figure 2d). The collected Raman spectrum resulted superimposable to the one of the  
234 pigment violanthrone. This chemical is used especially for textile (cotton/polyester) dyeing, coating  
235 products, adhesives, fragrances and air fresheners. The two main peaks composing both reference  
236 and sample spectra are those centred at  $1573\text{ cm}^{-1}$  (C-C stretching of benzene ring) and  $1307\text{ cm}^{-1}$

237 (in reference spectrum, an additional shoulder at  $\sim 1350\text{ cm}^{-1}$  is visible, assigned to C-C stretching  
238 and HCC bending).

239 **Particle #5** (Figure 2e). The collected Raman spectrum resulted perfectly superimposable to the one  
240 of the pigment copper phthalocyanine<sup>25</sup>. Hence, differently from the particle #2 and #10, it was not  
241 possible unveiling the identity of the polymer matrix. This pigment is reported to be used for  
242 staining of plastic materials, made of polyvinylchloride (PVC), low density polyethylene (LDPE),  
243 high density polyethylene (HDPE), polypropylene (PP), polyethylene terephthalate (PET).  
244 Furthermore, the pigment 74160 is widely used for staining coating products and finger paints.

245 **Particles #6 and #7** (Figures 2f). The collected Raman spectra resulted perfectly superimposable to  
246 the one of the red pigment oxo (oxoferriooxy) iron: the two spectra shared with the reference one  
247 the three main peaks at 220, 287 and  $401\text{ cm}^{-1}$ , typical of iron oxides<sup>26</sup>. The same pigment is  
248 reported as Pigment Red 101 and 102, depending on its synthetic or natural origin. This pigment is  
249 used as food additive, for coloration of plastics, rubber, textiles and paper.

250 **Particle #8** (Figure 2g). The collected Raman spectrum resulted superimposable to the one of the  
251 pigment Direct Blue 80. This dye is reported to be used for coloration of leather, paper and textiles.

252 **Particle #9** (Figure 2h). The collected Raman spectrum resulted superimposable to the one of the  
253 pigment Ultramarine Blue. This pigment is mainly applied in cosmetics, for example for  
254 formulations of soap, lipstick, mascara, eye shadow and other make-up products.

255 **Particle #11** (Figure 2i). The collected Raman spectrum resulted comparable to the one of a PP  
256 purple fibre. The Raman spectrum of the identified particle shared with the reference spectrum all  
257 the positions of the main peaks, partly ascribable to PP<sup>23</sup> (such as the peaks centred at  $397\text{ cm}^{-1}$ ,  
258 assigned to the wagging of  $\text{CH}_2$  moieties/bending of CH moieties, and at  $1455\text{ cm}^{-1}$ , assigned to the  
259 bending of  $\text{CH}_3$  and  $\text{CH}_2$  moieties), but mainly ascribable to the violet pigment (such as the bands  
260 centred at  $1193\text{ cm}^{-1}$ ,  $1335\text{ cm}^{-1}$  and  $1381\text{ cm}^{-1}$ )<sup>25</sup>.

261 **Particle #12** (Figure 2l). The collected Raman spectrum resulted superimposable to the one of the  
262 pink pigment Novoperm Bordeaux HF3R<sup>25</sup>. The Raman spectrum of this monoazopigment shared

263 with the sample spectrum the main peaks centred at 731 cm<sup>-1</sup>, 961 cm<sup>-1</sup>, 1219 cm<sup>-1</sup>, 1280 cm<sup>-1</sup>, 1360  
264 cm<sup>-1</sup>, and 1580 cm<sup>-1</sup>. This pigment is reported to be used to permanently coat and protect wood  
265 surfaces, in photographic chemicals, inks and toners, given its high solvent resistance and good heat  
266 stability.

267

268

## 269 **DISCUSSION**

270 In this study, we reported, for the first time, the presence of man-made microparticles and MPs in  
271 human placentas. The analysis of portions of maternal side, foetal side and chorioamniotic  
272 membranes of human placentas revealed the presence of 12 pigmented microparticles, compatible  
273 with microplastics and other man-made materials, in the placentas of 4 women out of the total of the  
274 6 analyzed. In particular, 5 microparticles were found in the foetal side, 4 in the maternal side and 3  
275 in the chorioamniotic membranes, indicating that these microparticles, once internalized, can  
276 colonize placenta tissues at all levels (Figure 3).

277 The identified microparticles were differentiated between stained microplastics (particles #2, #10  
278 and #11, all attributable to polypropylene) and paint/coating/dye microparticles, in which the  
279 polymer matrix had lower amount (particles #1, #3-9, and #12)<sup>19</sup>. All the microparticles were ~10  
280 µm in size, except for two that were smaller (~5 µm): these dimensions are compatible with a  
281 possible transportation by bloodstream. Previous analyses of 5-10 µm particles, by Electron  
282 Microscopy coupled with X-ray microprobe, revealed the presence of microparticles as foreign  
283 bodies in human internal organs<sup>27</sup>.

284 Microparticles and MPs may access the bloodstream and reach placenta from the gastrointestinal  
285 tract (GIT)<sup>28</sup>, from the maternal respiratory system (Figure 4A-B-C-D), or both, by M cells-  
286 mediated endocytosis mechanisms, or paracellular transport. It is known that the fraction of inhaled  
287 particles, with less than 2.5 µm, is largely retained in the lungs, but can pass through respiratory  
288 barriers<sup>29</sup>. The microparticles isolated in the present study have dimensions of 5-10 µm, making it

289 plausible that they were removed from the respiratory cilia, once internalized by inhalation; in effect,  
290 the most probable transport routes for nanoparticles is the diffusion through cellular membranes, while  
291 particles with dimensions of 10-20  $\mu\text{m}$  may reach internal organs mostly by mechanisms of particle  
292 uptake and translocation, as described for the internalization from the GIT<sup>30</sup>. GIT persorption is  
293 described as the translocation of particles into the circulatory system of the GIT through gaps in the  
294 epithelium of the villus tips; it is expected to represent the major uptake route for microparticles.  
295 Uptake and subsequent translocation to secondary target organs depend on several factors, including  
296 hydrophobicity, surface charge, surface functionalization and the associated protein corona, and  
297 particle size. The uptake and translocation to secondary target organs of microparticles were associated  
298 with inflammatory responses in the surrounding tissues, such as the immune activation of macrophages  
299 and the production of cytokines<sup>31</sup>.

300 Once microparticles have reached the maternal surface of the placenta (Figure 3), they can invade the  
301 tissue in depth by several transport mechanisms, both active and passive, that are not clearly  
302 understood yet<sup>32</sup>. The transplacental passage of 5-10  $\mu\text{m}$  size microparticles may depend on the  
303 different physiological conditions and genetic characteristics of placenta: this may explain, together  
304 with the diverse food habits and lifestyle of patients, the absence of microparticles in 2 of the 6  
305 analyzed placentas and the different localization and characteristics of the particles identified in the  
306 present study. It is known that a great variability exists in the expression and function of placental  
307 drug transporters, both within human populations (interindividual variability) and also during  
308 gestation (intraindividual variability)<sup>33</sup>. We suppose that this variability exists also in relation to the  
309 mechanism of particles' internalization.

310 The presence of microparticles in the placenta tissue requires to reconsider the immunological  
311 mechanism of self-tolerance. Placenta represents the interface between the foetus and the  
312 environment<sup>13</sup>. Embryos and fetuses must continuously adapt to the maternal environment and,  
313 indirectly, to the external one, by a series of complex responses. An important part of this series of  
314 responses consists in differentiate self and non-self<sup>14</sup>, a mechanism that may be perturbed by the

315 presence of microparticles and MPs. It is in fact reported that, once internalized, MPs may  
316 accumulate and exert localized toxicity by inducing and/or enhancing immune responses and,  
317 hence, potentially reducing the defence mechanisms against pathogens and altering the utilization of  
318 energy stores<sup>10</sup>.

319 Potentially, in placenta, MPs, and in general microparticles, may alter several cellular regulating  
320 pathways, such as immunity mechanisms during pregnancy, growth-factor signalling during and  
321 after implantation, functions of atypical chemokine receptors governing maternal-foetal  
322 communication, signalling between the embryo and the uterus, and trafficking of uterine dendritic  
323 cells, natural killer cells, T cells and macrophages during normal pregnancy. All these effects may  
324 lead to adverse pregnancy outcomes<sup>34</sup>. Three of the particles identified in the present study (particles  
325 #2, #10, and #12) resulted polypropylene (PP). It is known that polymers used in plastic products  
326 have cytotoxic effects. For example, the toxicity of PP particles appears related to their size: smaller PP  
327 particles may provide more surface area to disturb cell growth. Moreover, it was observed that, when  
328 administered as a powder, PP particles, neither smaller nor larger, were cytotoxic, while PP particles  
329 dispersed in medium have potentially greater toxicity. The administration of PP particles of dimensions  
330 of 5-10  $\mu\text{m}$  resulted in inducing murine macrophage cells to increase IL-6 secretion, suggesting that small  
331 PP particles may mimic potential pathogens<sup>35</sup>.

332 A crucial problem related to microplastics is their potential release of chemicals, which can cause severe  
333 damages to cells. In fact, plastic debris has shown to contain various contaminants, including  
334 micromolecular substances such as chemicals and monomers. Some of these substances, such as  
335 bisphenol A, phthalates and some of the brominated flame retardants, are endocrine disruptors, known  
336 to adversely affect human health upon exposure via ingestion and inhalation<sup>36</sup>. It is reported that low  
337 concentrations of bisphenol A can affect cell proliferation in human placental first trimester  
338 trophoblasts, downregulating mRNA expression of VEGF and causing an abnormal placental  
339 development<sup>37</sup>. Moreover, phthalates have been found in human urine and blood samples; they are

340 considered responsible of several effects in animals and humans, such as impairment of pubertal  
341 development, male and female reproductive health, pregnancy outcomes and respiratory health<sup>38</sup>.  
342 In conclusion, this is the first study revealing the presence of man-made microparticles in human  
343 placenta, shedding new light on the level of human exposure to microplastics and microparticles in  
344 general. The dimensions of the detected particles are consistent with the known mechanisms of  
345 particle uptake and translocation, described for other internalization routes and yet to be clarified in this  
346 organ. Due to the crucial role of placenta in hosting the foetus and in acting as an interface between the  
347 latter and the external environment, the presence of exogenous and potentially harmful particles is  
348 matter of great concern, for the possible consequences on pregnancy outcomes. Further studies need to  
349 be performed to increase the number of enrolled patients. Moreover, we are planning to investigate if  
350 microparticles are in the intracellular or extracellular compartment of tissues, moving from a digestion-  
351 based protocol to a histology-based one. Finally, further analyses will be necessary to assess if the  
352 presence of these particles in human placenta may trigger immune responses or determine the release of  
353 toxic contaminants, resulting harmful for pregnancy.

## 354 **References**

- 355 1. Joint Group of Experts on the Scientific Aspects of Marine Environmental Protection.  
356 Sources, fate and effects of microplastics in the marine environment: part 2 of a global  
357 assessment. (2016).
- 358 2. Hartmann, N. B. *et al.* Are We Speaking the Same Language? Recommendations for a  
359 Definition and Categorization Framework for Plastic Debris. *Environ. Sci. Technol.* **53**,  
360 1039–1047 (2019).
- 361 3. de Souza Machado, A. A., Kloas, W., Zarfl, C., Hempel, S. & Rillig, M. C. Microplastics as  
362 an emerging threat to terrestrial ecosystems. *Glob. Chang. Biol.* **24**, 1405–1416 (2018).
- 363 4. Barboza, L. G. A., Dick Vethaak, A., Lavorante, B. R. B. O., Lundebye, A.-K. &  
364 Guilhermino, L. Marine microplastic debris: An emerging issue for food security, food safety

- 365 and human health. *Mar. Pollut. Bull.* **133**, 336–348 (2018).
- 366 5. Karami, A. *et al.* The presence of microplastics in commercial salts from different countries.  
367 *Sci. Rep.* **7**, 46173 (2017).
- 368 6. Kosuth, M., Mason, S. A. & Wattenberg, E. V. Anthropogenic contamination of tap water,  
369 beer, and sea salt. *PLoS One* **13**, e0194970 (2018).
- 370 7. Schymanski, D., Goldbeck, C., Humpf, H.-U. & Fürst, P. Analysis of microplastics in water  
371 by micro-Raman spectroscopy: Release of plastic particles from different packaging into  
372 mineral water. *Water Res.* **129**, 154–162 (2018).
- 373 8. Deng, Y., Zhang, Y., Lemos, B. & Ren, H. Tissue accumulation of microplastics in mice and  
374 biomarker responses suggest widespread health risks of exposure. *Sci. Rep.* **7**, 46687 (2017).
- 375 9. Reineke, J. J. *et al.* Unique insights into the intestinal absorption, transit, and subsequent  
376 biodistribution of polymer-derived microspheres. *Proc. Natl. Acad. Sci.* **110**, 13803–13808  
377 (2013).
- 378 10. Wright, S. L. & Kelly, F. J. Plastic and Human Health: A Micro Issue? *Environ. Sci.*  
379 *Technol.* **51**, 6634–6647 (2017).
- 380 11. Presence of microplastics and nanoplastics in food, with particular focus on seafood. *EFSA J.*  
381 **14**, 4501–4531 (2016).
- 382 12. Schwabl, P. *et al.* Detection of Various Microplastics in Human Stool. *Ann. Intern. Med.*  
383 **171**, 453 (2019).
- 384 13. PrabhuDas, M. *et al.* Immune mechanisms at the maternal-fetal interface: perspectives and  
385 challenges. *Nat. Immunol.* **16**, 328–334 (2015).
- 386 14. Nancy, P. *et al.* Chemokine Gene Silencing in Decidual Stromal Cells Limits T Cell Access  
387 to the Maternal-Fetal Interface. *Science (80-. )*. **336**, 1317–1321 (2012).
- 388 15. WMA Declaration of Helsinki – Ethical Principles for Medical Research involving Human  
389 Subjects.
- 390 16. Karami, A. *et al.* A high-performance protocol for extraction of microplastics in fish. *Sci.*



- 391 *Total Environ.* **578**, 485–494 (2017).
- 392 17. Dehaut, A. *et al.* Microplastics in seafood: Benchmark protocol for their extraction and  
393 characterization. *Environ. Pollut.* **215**, 223–233 (2016).
- 394 18. SLOPP Library of Microplastics.
- 395 19. Imhof, H. K. *et al.* Pigments and plastic in limnetic ecosystems: A qualitative and  
396 quantitative study on microparticles of different size classes. *Water Res.* **98**, 64–74 (2016).
- 397 20. *Paints, Coatings and Solvents.* (Wiley, 1998). doi:10.1002/9783527611867.
- 398 21. Käßler, A. *et al.* Analysis of environmental microplastics by vibrational microspectroscopy:  
399 FTIR, Raman or both? *Anal. Bioanal. Chem.* **408**, 8377–8391 (2016).
- 400 22. European Chemical Agency.
- 401 23. Andreassen, E. Infrared and Raman spectroscopy of polypropylene. in *Polypropylene: An A-*  
402 *Z Reference* (ed. Karger-Kocsis, J.) (Kluwer Publishers, Dordrecht, 1999). doi:10.1007/978-  
403 94-011-4421-6.
- 404 24. Aguayo, T. *et al.* Raman vibrational study of pigments with patrimonial interest for the  
405 Chilean cultural heritage. *J. Chil. Chem. Soc.* **55**, 347–351 (2010).
- 406 25. Scherrer, N. C., Stefan, Z., Françoise, D., Annette, F. & Renate, K. Synthetic organic  
407 pigments of the 20th and 21st century relevant to artist's paints: Raman spectra reference  
408 collection. *Spectrochim. Acta Part A Mol. Biomol. Spectrosc.* **73**, 505–524 (2009).
- 409 26. Testa-Anta, M., Ramos-Docampo, M. A., Comesaña-Hermo, M., Rivas-Murias, B. &  
410 Salgueiriño, V. Raman spectroscopy to unravel the magnetic properties of iron oxide  
411 nanocrystals for bio-related applications. *Nanoscale Adv.* **1**, 2086–2103 (2019).
- 412 27. *Life Cycle Analysis of Nanoparticles: risk, assessment, and sustainability.* (DEStech  
413 Publications, Inc., 2015).
- 414 28. Arumugasaamy, N., Navarro, J., Kent Leach, J., Kim, P. C. W. & Fisher, J. P. In Vitro  
415 Models for Studying Transport Across Epithelial Tissue Barriers. *Ann. Biomed. Eng.* **47**, 1–  
416 21 (2019).

- 417 29. Schlesinger, R. B. Biological Disposition of Airborne Particles: Basic Principles and  
418 Application to Vehicular Emissions. in *Air Pollution, the Automobile, and Public Health*  
419 (eds. Watson, A., Bates, R. & D, K.) (1988).
- 420 30. Smith, D. J., Leal, L. G., Mitragotri, S. & Shell, M. S. Nanoparticle transport across model  
421 cellular membranes: when do solubility-diffusion models break down? *J. Phys. D. Appl.*  
422 *Phys.* **51**, 294004 (2018).
- 423 31. Hicks, D. G. *et al.* Granular Histiocytosis of Pelvic Lymph Nodes following Total Hip  
424 Arthroplasty. The Presence of Wear Debris, Cytokine Production, and Immunologically  
425 Activated Macrophages\*. *J. Bone Jt. Surg.* **78**, 482–96 (1996).
- 426 32. Tetro, N., Moushaev, S., Rubinchik-Stern, M. & Eyal, S. The Placental Barrier: the Gate and  
427 the Fate in Drug Distribution. *Pharm. Res.* **35**, 71 (2018).
- 428 33. Staud, F. & Ceckova, M. Regulation of drug transporter expression and function in the  
429 placenta. *Expert Opin. Drug Metab. Toxicol.* **11**, 533–555 (2015).
- 430 34. Ilekis, J. V. *et al.* Placental origins of adverse pregnancy outcomes: potential molecular  
431 targets: an Executive Workshop Summary of the Eunice Kennedy Shriver National Institute  
432 of Child Health and Human Development. *Am. J. Obstet. Gynecol.* **215**, S1–S46 (2016).
- 433 35. Hwang, J., Choi, D., Han, S., Choi, J. & Hong, J. An assessment of the toxicity of  
434 polypropylene microplastics in human derived cells. *Sci. Total Environ.* **684**, 657–669  
435 (2019).
- 436 36. Vethaak, A. D. & Leslie, H. A. Plastic Debris Is a Human Health Issue. *Environ. Sci.*  
437 *Technol.* **50**, 6825–6826 (2016).
- 438 37. Basak, S., Srinivas, V. & Duttaroy, A. K. Bisphenol-A impairs cellular function and alters  
439 DNA methylation of stress pathway genes in first trimester trophoblast cells. *Reprod.*  
440 *Toxicol.* **82**, 72–79 (2018).
- 441 38. Hauser, R. & Calafat, A. Phthalates and Human Health. *Occup. Environ. Med.* **62**, 806–818  
442 (2005).

443 **Figure Legends**

444 **Figure 1.** Design of the study.

445 **Figure 2.** Microphotographs and collected Raman spectra of: (a) Particle #1 (scale bar 5  $\mu\text{m}$ ); (b) Particles  
446 #2 and #10 (scale bar 5  $\mu\text{m}$  for #2 and 10  $\mu\text{m}$  for #10); (c) Particle #3 (scale bar 5  $\mu\text{m}$ ); (d) Particle #4 (scale  
447 bar 5  $\mu\text{m}$ ); (e) Particle #5 (scale bar 5  $\mu\text{m}$ ); (f) Particles #6 and #7 (scale bar 10  $\mu\text{m}$  for #6 and 5  $\mu\text{m}$  for #7);  
448 (g) Particle #8 (scale bar 10  $\mu\text{m}$ ); (h) Particle #9 (scale bar 10  $\mu\text{m}$ ); (i) Particle #11 (scale bar 5  $\mu\text{m}$ ), and (l)  
449 Particle #12 (scale bar 10  $\mu\text{m}$ ).

450 **Figure 3.** The figure illustrates the twelve microparticles that we found in the analyzed placentas and  
451 described in figure 1. They are located in the placental portion in which they were found.

452 **Figure 4 A-B-C-D. Hypothetical mechanisms by which microplastics penetrate human tissues.**

453 (A) Endocytosis by M cells. At the level of the Peyer's Patch, below the mucous gut, MPs  
454 ingested with food can be uptaken by endocytosis from the M cells, transported across the  
455 epithelium into the subepithelial dome where they encounter dendritic cells, which in turn transport  
456 them through the lymphatic circulation, from where they reach the blood. (B) Paracellular  
457 Diffusion. MPs could penetrate through the intestinal lumen from loose junctions. This  
458 phenomenon could partially explain why some inflammatory states, which increase loose junctions  
459 favour intestinal passage. Once the intestinal lumen has been crossed, the MPs are collected by the  
460 dendritic cells and transported in the lymphatic and subsequently in the systemic circulation. (C)  
461 Upper airways, At the level of the upper respiratory tract the mucus is thicker and allows a  
462 successful clearance of the foreign bodies particles, in addition, the mechanical movement of  
463 ciliated epithelium and the presence of surfactant prevents smaller particles from spreading through  
464 the epithelium and reach the circulation. (D) Lower airways, In the lower respiratory tract the  
465 mucus layer is thinner, thus facilitating the diffusion of particles which, thanks to their particular  
466 aerodynamic shape, are able to reach this part of the respiratory tract. Once penetrated, the MPs can  
467 spread into the general circulation by cellular uptake or diffusion. (*Modified from: Mowat, A.*  
468 *Anatomical basis of tolerance and immunity to intestinal antigens. Nat Rev Immunol 3, 331–341*

469 (2003). <https://doi.org/10.1038/nri1057>. And Ruge, C. A.; Kirch, J.; Lehr, C. M. Pulmonary drug  
470 delivery: From generating aerosols to overcoming biological barriers-therapeutic possibilities and  
471 technological challenges. *Lancet. Respir. Med.* 2013, 1(5), 402–413.)

472

473

474

475

476

477

478

479

480

481

482

483

484

485

486

487

488

489

490

491

492

493

494

495 **Acknowledgements** We would like to thank all San Giovanni Calibita Fatebenefratelli Hospital  
496 staff for their collaboration during the study and placentas collection.

497 **Author contributions**

498 A.R. and E.G. designed the study; C.S., P.C., V.N., O.C., F.P., M.C.A.R., F.B., S.D., E.D.A. and D.R.  
499 performed experiments; A.R., A.S., C.S., P.C., V.N., O.C., F.P., M.C.A.R., F.B., S.D., E.D.A., D.R. and  
500 E.G. analysed and interpreted data; A.R., E.G. M.M. and A.S. drafted the manuscript;

501 **Competing interests**

502 The authors declare no competing interests.

503 **Correspondence and requests for materials** should be addressed to A.S.

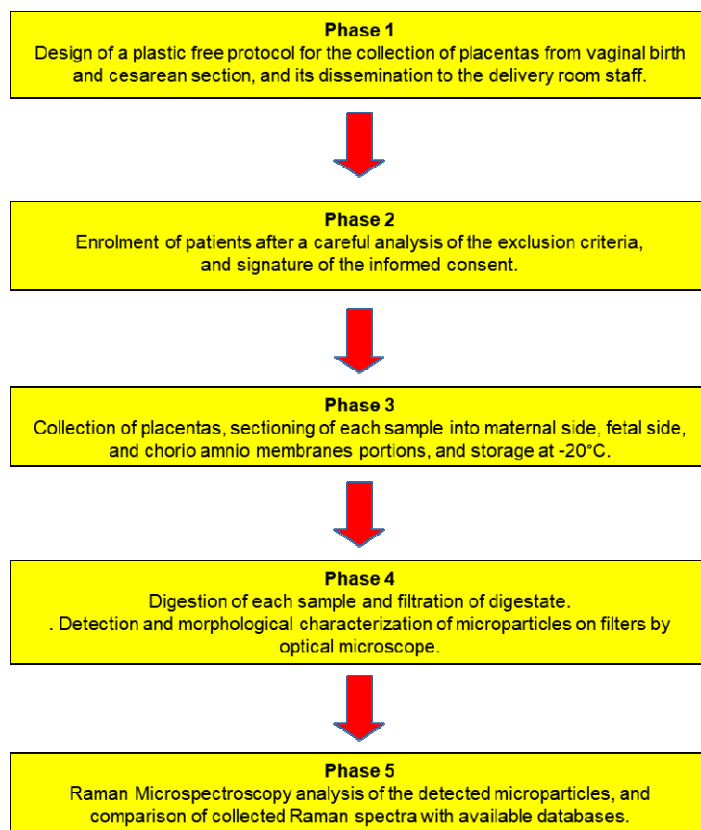

**Figure 1.** Design of the study.

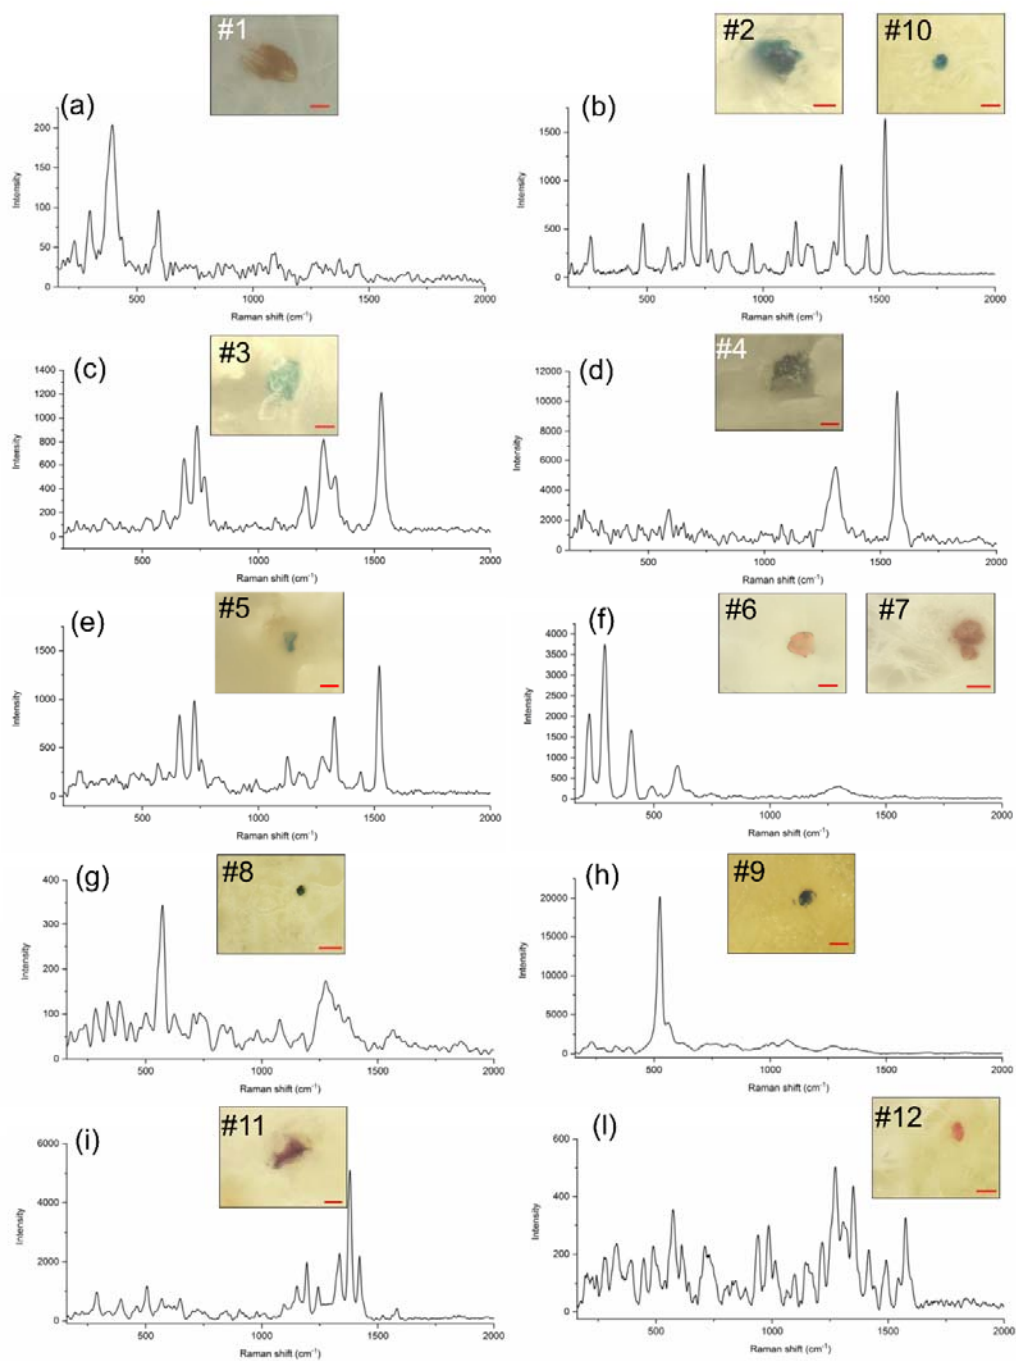

**Figure 2.** Microphotographs and collected Raman spectra of: (a) Particle #1 (scale bar 5 μm); (b) Particles #2 and #10 (scale bar 5 μm for #2 and 10 μm for #10); (c) Particle #3 (scale bar 5 μm); (d) Particle #4 (scale bar 5 μm); (e) Particle #5 (scale bar 5 μm); (f) Particles #6 and #7 (scale bar 10 μm for #6 and 5 μm for #7); (g) Particle #8 (scale bar 10 μm); (h) Particle #9 (scale bar 10 μm); (i) Particle #11 (scale bar 5 μm), and (l) Particle #12 (scale bar 10 μm).

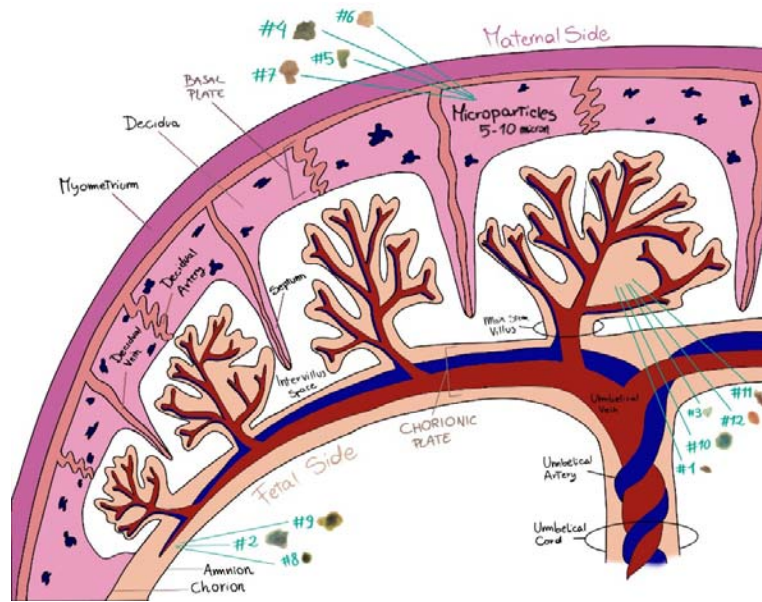

**Figure 3.** The figure illustrates the twelve microparticles that we found in the analyzed placentas and described in figure 1. They are located in the placental portion in which they were found.



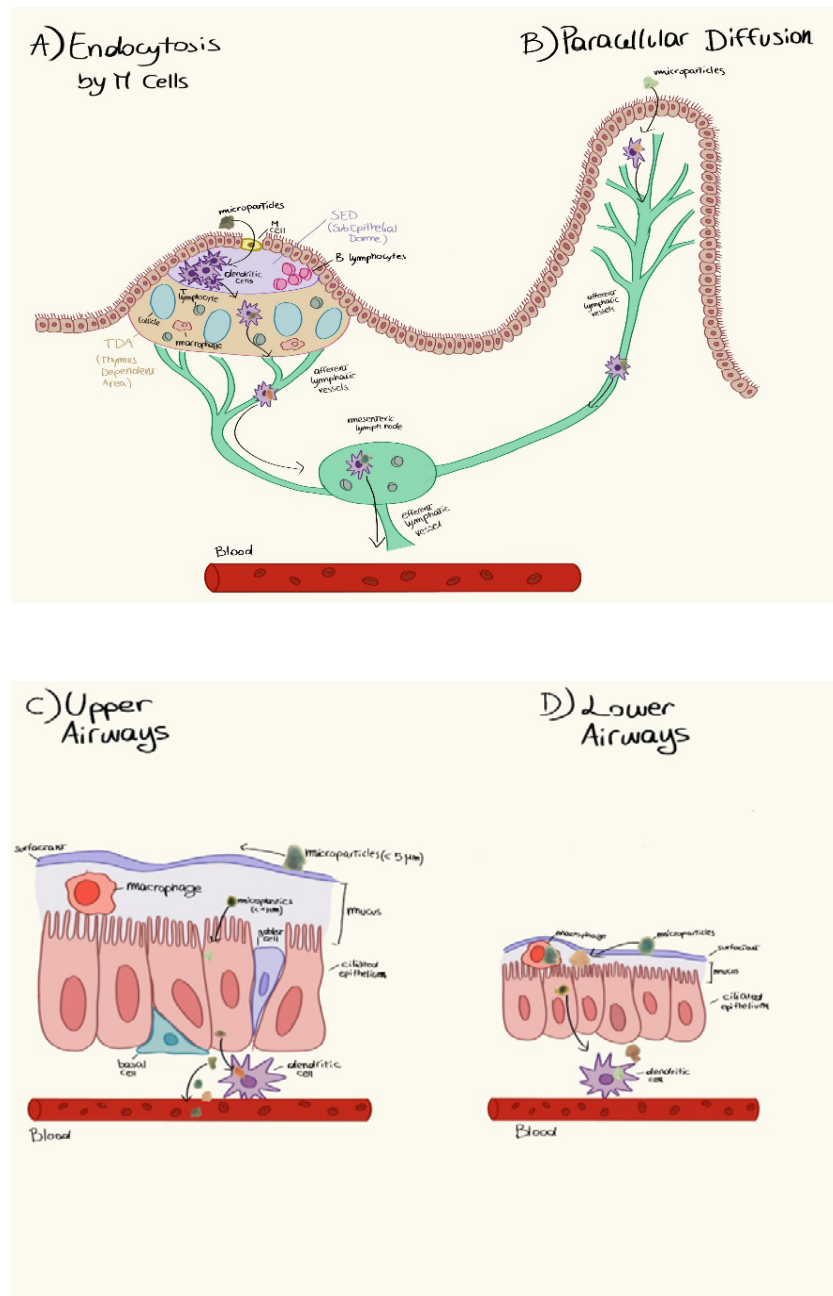

**Figure 4 A-B-C-D. Hypothetical mechanisms by which microplastics penetrate human tissues.** (A) Endocytosis by M cells. At the level of the Peyer's Patch, below the mucous gut, MPs ingested with food can be uptaken by endocytosis from the M cells, transported across the epithelium into the subepithelial dome where they encounter dendritic cells, which in turn transport them through the lymphatic circulation, from where they reach the blood. (B) Paracellular Diffusion. MPs could penetrate through the intestinal lumen from loose junctions. This phenomenon could partially explain why some inflammatory states, which increase loose junctions favour intestinal passage. Once the intestinal lumen has been crossed, the MPs are collected by the dendritic cells and transported in the lymphatic and subsequently in the systemic circulation. (C) Upper airways, At the level of the upper respiratory tract the mucus is thicker and allows a successful clearance of the foreign bodies particles, in addition, the mechanical movement of ciliated epithelium and the presence of surfactant prevents smaller particles from spreading through the epithelium and reach the circulation. (D) Lower airways, In the lower respiratory tract the

mucus layer is thinner, thus facilitating the diffusion of particles which, thanks to their particular aerodynamic shape, are able to reach this part of the respiratory tract. Once penetrated, the MPs can spread into the general circulation by cellular uptake or diffusion. (*Modified from: Mowat, A. Anatomical basis of tolerance and immunity to intestinal antigens. Nat Rev Immunol 3, 331–341 (2003). <https://doi.org/10.1038/nri1057>. And Ruge, C. A.; Kirch, J.; Lehr, C. M. Pulmonary drug delivery: From generating aerosols to overcoming biological barriers-therapeutic possibilities and technological challenges. Lancet. Respir. Med. 2013, 1(5), 402–413.*)
